# Supplementary material for: Origin of the analytical 183W effect and its implications for tungsten isotope analyses
Source: Royal Society of Chemistry journal article supplement (doi:10.1039/d2ja00102k), 2022-01-01
Supplement: d2ja00102k1.xlsx [file d2ja00102k1.xlsx]

## Sheet: Table S1
	Table S1. W isotope data for kimberlites, geological reference materials, and solution standards evaluated in this study.
	Sample	ID	Mass	Winitial	Yield	n	µ182Wmeas.			µ183Wmeas.			µ183Wcorr.*			µ182Wmeas.			µ182Wcorr.*			µ184Wmeas.			µ184Wcorr.*			µ182/184Wmeas.			µ182/184Wcorr.*			µ183/184Wmeas.			µ183/184Wcorr.*			δ186/184W			Ref.
			(g)	(ng)	(%)		(± 2σ)			(± 2σ)			(± 2σ)			(± 2σ)			(± 2σ)			(± 2σ)			(± 2σ)			(± 2σ)			(± 2σ)			(± 2σ)			(± 2σ)			(± 2σ)
							normalized to 186W/184W = 0.92767 ('6/4')									normalized to 186W/183W = 1.98590 ('6/3')
	KIMBERLITES
	BOT17-03	K1	0.529367	141.934	70.1054	2	3.85098	±	8.64623	-11.0698	±	9.04746	2.80993	±	11.1835	18.5063	±	8.76495	3.78179	±	14.8882	7.36227	±	6.01734	-1.8909	±	7.44409	11.2079	±	6.24628	3.84559	±	8.67315	-7.36229	±	6.01727	3.84559	±	8.67315	-0.221241	±	0.359231	T20
	BOT17-05	K2	0.510344	83.7736	65.5568	1	0.16994	±	8.64623	-13.2946	±	9.04746	0.351432	±	11.1835	18.1947	±	8.76495	0.510716	±	14.8882	8.84201	±	6.01734	-0.255358	±	7.44409	9.10574	±	6.24628	0.263781	±	8.67315	-8.84196	±	6.01727	0.263781	±	8.67315	-0.0790125	±	0.359231	T20
	BOT17-09	K3	0.504205	346.698	77.4673	7	-0.296924	±	3.26304	-14.2189	±	2.93312	0.108863	±	3.1885	19.1037	±	1.66711	0.190127	±	4.24268	9.45678	±	1.95071	-0.0950636	±	2.12134	9.35994	±	1.74282	-0.0967546	±	2.61588	-9.45669	±	1.95074	-0.0967546	±	2.61588	-0.307853	±	0.10053	T20
	CIM15-72	K4	0.513432	277.195	65.7379	5	1.18311	±	5.28898	-12.0046	±	4.75532	1.24716	±	7.24495	17.6691	±	7.28788	1.70099	±	9.6499	7.98404	±	3.16257	-0.850495	±	4.82495	9.19179	±	5.23022	1.20777	±	6.11207	-7.98402	±	3.16264	1.20777	±	6.11207	-0.309203	±	0.186435	T20
	CIM15-80	K5	0.514655	272.07	63.052	5	0.314447	±	6.1135	-13.4084	±	4.51713	0.6525	±	7.21628	18.7479	±	7.5035	0.912407	±	9.61297	8.91773	±	3.00444	-0.456203	±	4.80649	9.75181	±	6.00082	0.834168	±	6.71086	-8.91764	±	3.00428	0.834168	±	6.71086	-0.369939	±	0.156571	T20
	ANG14-287	K6	0.553103	1190.19	79.1141	10	0.354859	±	1.31332	-11.2778	±	2.55788	0.0544942	±	3.81348	15.1097	±	3.77122	0.108331	±	5.07917	7.50071	±	1.70117	-0.0541653	±	2.53959	8.1281	±	2.2035	0.62746	±	2.78378	-7.50063	±	1.70118	0.62746	±	2.78378	-0.459843	±	0.105054	T20
	IH57	K7	0.532962	811.484	74.9605	10	-5.96573	±	3.08734	-14.3117	±	2.86963	-4.56921	±	3.96718	12.99	±	3.6524	-6.04706	±	5.283	9.51852	±	1.90853	3.02353	±	2.6415	3.45864	±	2.56324	-6.05976	±	3.19573	-9.5184	±	1.90852	-6.05976	±	3.19573	-0.44427	±	0.0769611	T20
	LES17-02	K8	0.502418	591.411	76.5399	9	2.08501	±	2.97301	-9.32406	±	3.38205	1.07647	±	4.20569	13.8674	±	3.3332	1.46476	±	5.59896	6.20131	±	2.24934	-0.732379	±	2.79948	7.87639	±	2.4793	1.67515	±	3.3476	-6.20124	±	2.24933	1.67515	±	3.3476	-0.230742	±	0.132893	T20
	SAF17-11	K9	0.508587	460.765	68.457	8	0.048621	±	4.66527	-11.6572	±	3.13807	-0.00735203	±	3.90377	15.5331	±	3.09608	0.0274228	±	5.19718	7.75283	±	2.08716	-0.0137114	±	2.59859	7.64343	±	3.23109	-0.109462	±	3.84654	-7.75289	±	2.08708	-0.109462	±	3.84654	-0.333145	±	0.13156	T20
	SAF17-15	K10	0.529646	1570.45	77.7457	10	0.619311	±	3.62468	-7.24954	±	4.46653	0.531896	±	5.27107	10.3752	±	3.73197	0.73219	±	7.0163	4.82153	±	2.97073	-0.366095	±	3.50815	5.58458	±	2.22228	0.76307	±	3.70986	-4.82151	±	2.97061	0.76307	±	3.70986	-0.245127	±	0.0717893	T20
	LES17-02	K11	1.49653	1761.61	62.4589	9	-1.35352	±	3.16298	-10.9054	±	3.37964	-0.971603	±	4.10679	13.2451	±	3.11092	-1.26105	±	5.46675	7.25308	±	2.24764	0.630527	±	2.73337	6.02232	±	2.29978	-1.23066	±	3.21577	-7.25298	±	2.2477	-1.23066	±	3.21577	-0.25296	±	0.100135	T20
	IH17	K12	0.55135	1308.54	74.2052	10	-2.99649	±	2.74211	-7.85915	±	2.57569	-2.11159	±	3.85136	7.66342	±	3.8178	-2.79065	±	5.12974	5.22704	±	1.71308	1.39533	±	2.56487	2.46624	±	2.94446	-2.76072	±	3.40652	-5.22696	±	1.71304	-2.76072	±	3.40652	-0.392124	±	0.133068	T20
	IH53	K13	0.546288	369.268	57.2995	7	-0.549894	±	3.35804	-15.1097	±	3.68621	-0.781553	±	5.13839	19.1043	±	4.77305	-0.994859	±	6.84261	10.0496	±	2.45149	0.497429	±	3.4213	9.2425	±	3.36737	-0.806731	±	4.16527	-10.0492	±	2.45159	-0.806731	±	4.16527	-0.31032	±	0.159524	T20
	ITA-1	K14	0.558474	1417.69	69.147	10	-2.10306	±	3.06878	-7.98289	±	2.88626	-1.7883	±	3.80316	8.25946	±	3.30213	-2.35891	±	5.06396	5.30918	±	1.91961	1.17945	±	2.53198	2.99385	±	2.56807	-2.31538	±	3.20622	-5.30923	±	1.91959	-2.31538	±	3.20622	-0.374246	±	0.104147	T20
	BOT17-01	K15	0.540743	242.173	59.2781	4	0.121261	±	8.64623	-15.5575	±	6.65965	0.299465	±	9.3576	21.1426	±	8.76495	0.448234	±	12.4613	10.3472	±	4.42889	-0.224117	±	6.23066	10.7215	±	6.24628	0.37452	±	7.65723	-10.347	±	4.42912	0.37452	±	7.65723	-0.333878	±	0.24707	T20
	ANG14-325	K16	0.548559	2688.29	79.5496	9	-0.9983	±	3.08197	-4.96632	±	2.28763	-0.338651	±	3.09879	6.17022	±	2.78703	-0.435465	±	4.12637	3.30284	±	1.52146	0.217733	±	2.06318	2.56614	±	1.94857	-0.736816	±	2.47219	-3.30296	±	1.52145	-0.736816	±	2.47219	-0.0703973	±	0.200714	T20
	ANG14-366	K17	0.561772	208.482	59.0731	4	-3.60919	±	7.76748	-20.1671	±	5.28711	-2.93655	±	5.34691	22.9741	±	1.06321	-3.85221	±	7.11229	13.4132	±	3.51619	1.92611	±	3.55615	9.68853	±	4.22847	-3.72425	±	5.49949	-13.4128	±	3.51631	-3.72425	±	5.49949	-0.320907	±	0.204551	T20
	NAM18-02	K18	0.548232	11958.9	91.0091	10	0.154071	±	2.7458	-2.84376	±	2.28689	0.157938	±	3.82114	4.00226	±	4.08167	0.219907	±	5.09048	1.89118	±	1.52093	-0.109953	±	2.54524	2.31555	±	3.03573	0.424266	±	3.39543	-1.89129	±	1.52095	0.424266	±	3.39543	0.132077	±	0.123218	T20
	SAF18-51	K19	0.548477	4379.73	80.8833	10	-3.01036	±	2.22438	-4.34987	±	3.16233	-1.95767	±	4.42823	3.1896	±	4.13309	-2.5962	±	5.89719	2.8929	±	2.10324	1.2981	±	2.9486	0.011476	±	2.59954	-2.8815	±	3.34381	-2.89298	±	2.10321	-2.8815	±	3.34381	-0.204029	±	0.111546	T20
	SAF18-57	K20	0.561762	246.924	60.1389	4	-0.734343	±	4.83968	-16.8317	±	5.02352	0.186196	±	8.27342	22.6906	±	8.76495	0.301338	±	11.0216	11.1946	±	3.34108	-0.150669	±	5.5108	11.0886	±	6.24628	-0.105819	±	7.08368	-11.1944	±	3.34104	-0.105819	±	7.08368	-0.411983	±	0.240618	T20
	SAF18-59	K21	0.568195	1228.97	67.425	10	3.985	±	2.61599	-7.47036	±	1.90847	3.11837	±	3.31454	14.1183	±	3.61329	4.18155	±	4.41586	4.96838	±	1.26925	-2.09077	±	2.20793	9.05709	±	2.75784	4.08872	±	3.03591	-4.96837	±	1.26928	4.08872	±	3.03591	-0.384362	±	0.101864	T20
	LES17-02	K22	1.06347	1251.84	72.151	10	0.219557	±	3.8761	-10.0226	±	3.44647	0.0331304	±	4.58188	13.4076	±	4.02559	0.0760478	±	6.10103	6.66579	±	2.29223	-0.0380239	±	3.05052	7.15213	±	3.41046	0.486337	±	4.10918	-6.6658	±	2.29218	0.486337	±	4.10918	-0.0289257	±	0.124761	T20
	LES17-01	K23	1.06886	535.148	60.0664	8	0.911083	±	3.35133	-13.33	±	3.87212	0.441107	±	5.49824	18.3614	±	5.20467	0.630154	±	7.32233	8.86564	±	2.57526	-0.315077	±	3.66117	9.96849	±	3.40887	1.103	±	4.27228	-8.8655	±	2.57526	1.103	±	4.27228	0.142752	±	0.1311	T20
	LES17-03	K24	1.06866	840.09	61.4293	9	0.703403	±	2.89462	-14.2277	±	3.37754	0.300691	±	3.99645	19.3712	±	2.84844	0.446051	±	5.31971	9.46259	±	2.24643	-0.223026	±	2.65985	10.2882	±	1.52857	0.825664	±	2.71709	-9.46255	±	2.24634	0.825664	±	2.71709	0.076962	±	0.129584	T20
	ANG14-287	K25	0.4992	1074.2	61.2713	10	2.18443	±	2.98764	-8.27236	±	2.5527	2.02151	±	3.99145	13.7252	±	4.09128	2.72174	±	5.31681	5.50171	±	1.69779	-1.36087	±	2.65841	8.08617	±	3.13583	2.58443	±	3.56592	-5.50175	±	1.69775	2.58443	±	3.56592	-0.285509	±	0.135437	T20
	SAF17-15	K26	0.52484	1556.2	82.5323	9	1.85713	±	2.81366	-3.48853	±	2.26955	1.73753	±	2.96359	6.96809	±	2.54104	2.32796	±	3.94603	2.32006	±	1.50949	-1.16398	±	1.97301	4.51979	±	1.93634	2.19966	±	2.45516	-2.32013	±	1.50944	2.19966	±	2.45516	-0.0708074	±	0.112573	T20
	IH57	K27	0.52238	795.373	62.4173	9	-0.79146	±	2.13708	-7.26783	±	1.95861	-0.0593775	±	2.44711	9.61127	±	1.95605	-0.0558796	±	3.2578	4.83358	±	1.30261	0.0279398	±	1.6289	4.40231	±	1.62493	-0.431338	±	2.0826	-4.83365	±	1.30262	-0.431338	±	2.0826	-0.320379	±	0.0850438	T20
	IH45	K28	0.52664	354.457	67.3234	6	-2.80347	±	3.58764	-12.7865	±	3.99161	-2.25222	±	4.85483	14.0457	±	3.68454	-2.9625	±	6.46286	8.50409	±	2.65484	1.48125	±	3.23143	5.76522	±	3.06864	-2.73879	±	4.05761	-8.50401	±	2.65475	-2.73879	±	4.05761	-0.148846	±	0.0968282	T20
	NAM18-01	K29	1.06323	353.615	59.5654	5	1.88128	±	5.08487	-14.483	±	4.87876	1.35562	±	5.56429	21.1182	±	3.56751	1.85341	±	7.40558	9.6324	±	3.24482	-0.926707	±	3.70279	11.3912	±	2.81259	1.75887	±	4.29409	-9.63235	±	3.24477	1.75887	±	4.29409	-0.143274	±	0.142846	T20
	SAF18-58	K30	0.523305	1553.73	79.4235	10	1.79701	±	3.82719	-7.38329	±	3.02958	1.53163	±	3.40072	11.8866	±	2.0598	2.06566	±	4.52583	4.91045	±	2.01497	-1.03283	±	2.26292	6.8631	±	2.29772	1.95265	±	3.05604	-4.91045	±	2.01492	1.95265	±	3.05604	-0.254413	±	0.124244	T20
	GEOLOGICAL REFERENCE MATERIALS
	JG-1	DI35	0.899	1149.37	80.537	10	0.09356	±	4.07567	-3.43094	±	3.12386	0.289997	±	4.08468	4.96125	±	3.509	0.37487	±	5.45868	2.29319	±	2.0907	-0.187435	±	2.72934	2.62094	±	2.99779	0.339114	±	3.64735	-2.28182	±	2.07761	0.339114	±	3.64735	-0.134809	±	0.136134	T20
	JA-2	DI36	1.50696	1540.11	88.2301	10	1.43136	±	3.64737	-4.04406	±	3.30368	1.60307	±	4.53221	7.5295	±	4.13691	2.12011	±	6.06642	2.7047	±	2.21853	-1.06005	±	3.03321	4.64727	±	3.30966	1.9577	±	3.9726	-2.68958	±	2.1972	1.9577	±	3.9726	-0.192564	±	0.164314	T20
	JB-2	JB202	0.493739	156.21	59.8815	3	2.85825	±	8.64623	-17.6474	±	9.04746	2.10784	±	11.1835	26.3403	±	8.76495	2.8655	±	14.8882	11.7374	±	6.01734	-1.43275	±	7.44409	14.6603	±	6.24628	2.92336	±	8.67315	-11.737	±	6.01727	2.92336	±	8.67315	-0.134233	±	0.359231	T20
	JB-2	JB204	0.526322	162.973	59.5433	3	-1.89832	±	8.64623	-21.0215	±	9.04746	-1.20473	±	11.1835	26.4224	±	8.76495	-1.54023	±	14.8882	13.9813	±	6.01734	0.770117	±	7.44409	12.0768	±	6.24628	-1.90425	±	8.67315	-13.981	±	6.01727	-1.90425	±	8.67315	-0.444367	±	0.359231	T20
	JB-2	JB205	0.521701	164.682	64.6436	3	0.466463	±	8.64623	-16.5497	±	9.04746	0.38767	±	11.1835	22.5832	±	8.76495	0.568971	±	14.8882	11.0071	±	6.01734	-0.284486	±	7.44409	11.6608	±	6.24628	0.653962	±	8.67315	-11.0069	±	6.01727	0.653962	±	8.67315	-0.0796376	±	0.359231	T20
	DTS-2b	DTS39	3.32307	35.3907	49.438	1	4.53763	±	12.3086	-22.0318	±	12	2.17184	±	15.4616	32.2715	±	13	2.96246	±	20.6155	14.6545	±	8	-1.48123	±	10.3078	16.3147	±	9	1.66153	±	12.0416	-14.6532	±	8	1.66153	±	12.0416	0.0901396	±	0.359231	this
	DTS-2b	DTS32-41	0.979177	59.855	61.1976	7	2.28368	±	5.7239	-17.6218	±	4.19223	1.60149	±	6.40173	25.6311	±	6.45082	2.19117	±	8.52674	11.7199	±	2.78802	-1.09558	±	4.26337	13.4817	±	4.72552	1.7618	±	5.48673	-11.7199	±	2.78813	1.7618	±	5.48673		–		B15
	BHVO-2	BHV15-21	0.503029	108.151	68.4921	20	-4.07741	±	3.97649	-17.7501	±	5.24898	-3.06358	±	7.01169	19.582	±	6.1985	-4.02849	±	9.33704	11.8053	±	3.49138	2.01425	±	4.66852	7.75531	±	4.14794	-4.04988	±	5.42152	-11.8052	±	3.49106	-4.04988	±	5.42152		–		B18
	SRM 129c	N9C01	0.30106	225.193	74.6239	5	-1.01616	±	9.1835	-15.1022	±	2.28662	-1.69996	±	6.60601	17.8697	±	8.26353	-2.21817	±	8.80552	10.0439	±	1.52079	1.10908	±	4.40276	9.26462	±	7.33804	-0.779492	±	7.49397	-10.0441	±	1.52078	-0.779492	±	7.49397		–		B18
	SRM 129c	N9C02	0.333052	249.123	73.7875	5	5.30981	±	4.03528	-10.5196	±	4.97131	2.84903	±	8.52266	17.8248	±	9.23008	3.83232	±	11.3545	6.99626	±	3.30644	-1.91616	±	5.67725	11.7308	±	5.18006	4.7345	±	6.14532	-6.99633	±	3.30633	4.7345	±	6.14532		–		B18
	SRM 129c	N9C03	0.33905	253.609	58.0783	5	5.41719	±	5.48526	-17.2017	±	4.62268	4.23715	±	8.07301	28.5851	±	8.82465	5.7044	±	10.7553	11.4404	±	3.07421	-2.8522	±	5.37767	16.606	±	6.62116	5.16558	±	7.30011	-11.4404	±	3.07439	5.16558	±	7.30011		–		B18
	SRM 129c	N9C04	0.316203	236.52	63.8711	5	5.89388	±	8.00641	-9.94187	±	5.06519	4.54491	±	6.30243	19.3157	±	5.00035	6.09103	±	8.39046	6.61234	±	3.36884	-3.04551	±	4.19523	12.1227	±	4.63761	5.51056	±	5.73202	-6.61216	±	3.36876	5.51056	±	5.73202		–		B18
	SRM 129c	N9C05	0.30381	227.25	74.4602	5	1.90587	±	8.26828	-17.4698	±	6.13306	1.43228	±	8.77544	25.2028	±	8.3686	1.96533	±	11.6871	11.6187	±	4.07908	-0.982664	±	5.84357	13.8372	±	7.07748	2.2185	±	8.16877	-11.6188	±	4.07899	2.2185	±	8.16877		–		B18
	DIFFERENT OPERATORS/LABORATORIES (selected)
	SRM 129c	#1-20				20	1	±	1.78885	-14	±	1.78885	1	±	2.13966	20	±	1.56525	0	±	2.72947	10	±	1.11803	0	±	1.36473		–			–			–			–			–		C16
	SRM 129c	BW09				5	0.6	±	5.38373	-4.8	±	3.33173	0.45	±	5.25145	7	±	5.41229	1	±	7.34578	3	±	2.48333	-0.5	±	3.67289		–			–			–			–			–		K17a
	BCR-2	–				10	-0.3	±	2.88222	-1.1	±	3.22484	-0.575	±	4.08308	0.7	±	3.33918	-0.3	±	5.51078	0.5	±	2.19195	0.15	±	2.75539		–			–			–			–			–		K17b
	BCR-2	–				10	0	±	9	-9	±	4	0.75	±	8.5	13	±	10	1	±	14.1421	6	±	5	-0.5	±	7.07107		–			–			–			–			–		H15
	BCR-2	–				22	0.227273	±	2.23969	-7.13636	±	2.97675	-0.0113636	±	4.12043	9.5	±	3.79869	0.954545	±	5.82362	4.27273	±	2.20707	-0.477273	±	2.91181		–			–			–			–			–		K15
	BHVO-2	–				18	-0.555556	±	2.32138	-6.11111	±	2.76031	-0.277778	±	4.22377	7.77778	±	4.2627	-0.444444	±	5.76943	4.11111	±	1.94395	0.222222	±	2.88471		–			–			–			–			–		K17b
	JB-2	–				16	0.5	±	2.5	-11.8	±	2.3	0.65	±	2.96743	16.6	±	2.5	1	±	3.90512	7.8	±	1.5	-0.5	±	1.95256	8.4	±	1.9	0.6	±	2.42074	-7.8	±	1.5	0.6	±	2.42074		–		A19
	AGV-2	–				12	0.166667	±	3.40365	-8.33333	±	3.19796	0.104167	±	4.85041	11.25	±	4.86247	-0.25	±	6.47173	5.75	±	2.1354	0.125	±	3.23587		–			–			–			–			–		K15
	La Palma basalt	LP1 (weak)				7	0.873449	±	5.1069	-16.1371	±	1.9996	0.209114	±	6.42532	21.795	±	8.14167	0.329829	±	8.56514	10.7326	±	1.32993	-0.164914	±	4.28257		–			–			–			–			–		T19
	SOLUTION STANDARDS
	Alfa Aesar (IfP)					–	≡ 0			≡ 0						≡ 0						≡ 0						≡ 0						≡ 0									–
	Specpure Plasma (IGL)^					40	-1.5	±	1.5	-1.8	±	1.5				1.4	±	1.5				1.2	±	1				0.4	±	1.2				-1.2	±	1							this
	NIST SRM 3163					5	-2	±	3	-1	±	3				1	±	3				-1	±	2				0	±	3					–								K12
	INTERCEPTS (µiW at yield=100%)
	(calculated)					43	-0.7	±	2.3	3.7	±	4.2				-6.4	±	5.7				-2.4	±	2.8				-2.4	±	3.3				2.4	±	2.8							this
	Winitial: the total amount of W initially present in a sample before the ion exchange chromatography (determined by isotope dilution); n: number of measurements.
	Unless stated otherwise, the denominator in the µiW notation is the same as in the normalization ratio [e.g., µ183W (6/4) represents µ183/184W internally normalized to 186W/184W].
	^ Measured in different analytical sessions, run alternately with the IfP standard at 50 ng/ml W; see Section 2.2 for details
	* Corrected (internally) for the analytical 183W effect using the slopes for a pure 183W deficit ('m') provided in Table S2, where µiWcorr = µiWmeas – m × µjWmeas:
	µ182W (6/3)corr = µ182W (6/3)meas – 2 × µ184W (6/3)meas
	µ182/184W (6/3)corr = µ182/184W (6/3)meas – (-1) × µ183/184W (6/3)meas
	µ183W (6/4)corr = µ183W (6/4)meas – (-0.75) × µ182W (6/3)meas
	µ184W (6/3)corr = µ184W (6/3)meas – 0.5 × µ182W (6/3)meas
	µ183/184W (6/3)corr = µ183/184W (6/3)meas – (-1) × µ182/184W (6/3)meas
	Uncertainties include all propagated uncertainties induced by the correction, where σ(µiWcorr)² = σ(µiWmeas)² + m² × σ(µjWmeas)².
	A19: Archer et al. (2019a)
	B15: Budde et at. (2015)
	B18: Budde et al. (2018)
	C16: Cook and Schönbächler (2016)
	H15: Holst et al. (2015)
	K12: Kruijer et al. (2012)
	K15: Kruijer et al. (2015)
	K17a: Kruijer et al. (2017a)
	K17b: Kruijer et al. (2017b)
	T20: Tappe et al. (2020)
	T19: Tusch et al. (2019)

## Sheet: Table S2
	Table S2. Theoretical effects of a pure 183W deficit and a nuclear field shift on internally normalized W isotope ratios.
		180W/184W*	182W/184W*	183W/184W*	180W/183W^	182W/183W^	184W/183W^	182W/184W^	183W/184W^
	Pure 183W deficit ('analytical 183W effect')
	180W/184W*	–	–	∞	∞	∞	∞	∞	∞
	182W/184W*	–	–	∞	∞	∞	∞	∞	∞
	183W/184W*	0	0	–	-2	-1.334	-0.667	-0.667	0.667
	180W/183W^	0	0	-0.5	–	0.667	0.333	0.333	-0.333
	182W/183W^	0	0	-0.75	1.5	–	0.5	0.5	-0.5
	184W/183W^	0	0	-1.5	3	2	–	1	-1
	182W/184W^	0	0	-1.5	3	2	1	–	-1
	183W/184W^	0	0	1.5	-3	-2	-1	-1	–
	NFS effect based on Lee et al. (2013) data
	180W/184W*	–	-1.27138	-0.397296	1.80777	-0.738654	0.263511	-1.00652	-0.264864
	182W/184W*	-0.786545	–	0.312491	-1.42189	0.580984	-0.207263	0.791673	0.208327
	183W/184W*	-2.51702	3.20009	–	-4.55019	1.8592	-0.663262	2.53343	0.666667
	180W/183W^	0.553168	-0.703289	-0.219771	–	-0.4086	0.145766	-0.556775	-0.146514
	182W/183W^	-1.35381	1.72122	0.537864	-2.44738	–	-0.356745	1.36264	0.358576
	184W/183W^	3.7949	-4.82478	-1.5077	6.86031	-2.80312	–	-3.81965	-1.00513
	182W/184W^	-0.993522	1.26315	0.394722	-1.79606	0.733869	-0.261804	–	0.263148
	183W/184W^	-3.77553	4.80014	1.5	-6.82528	2.78881	-0.994894	3.80014	–
	NFS effect based on Angeli (2004) data
	180W/184W*	–	-1.77498	-44.5254	91.5277	57.9287	29.532	27.9086	-29.6836
	182W/184W*	-0.563386	–	25.085	-51.5654	-32.6362	-16.6379	-15.7233	16.7233
	183W/184W*	-0.0224591	0.0398645	–	-2.05563	-1.30103	-0.663262	-0.626802	0.666667
	180W/183W^	0.0109257	-0.0193928	-0.486469	–	0.632909	0.322657	0.30492	-0.324313
	182W/183W^	0.0172626	-0.0306408	-0.768624	1.58001	–	0.5098	0.481775	-0.512416
	184W/183W^	0.0338616	-0.0601036	-1.5077	3.09927	1.96155	–	0.945029	-1.00513
	182W/184W^	0.0358312	-0.0635998	-1.5954	3.27955	2.07566	1.05817	–	-1.0636
	183W/184W^	-0.0336886	0.0597967	1.5	-3.08344	-1.95154	-0.994894	-0.940203	–
	Values represent predicted slopes in diagrams of µiW (y-axis; top row) vs. µjW (x-axis; leftmost column).
	W isotope ratios are internally normalized to 186W/184W ('*') or 186W/183W ('^').
	The analytical 183W effect can essentially be described as a pure 183W deficit (see main text); recommended values for the correction of this analytical artifact (as used in Table S1) are displayed in bold.
	NFS effects were calculated using Eqt. 1 from Fujii et al. (2006), based on isotope masses from Wang et al. (2017) and:
		(i) the difference in mean-square nuclear charge radii (δ<r2>) from Lee et al. (2013); these slopes are shown in Fig. 2
		(ii) the inaccurate nuclear charge radii from Angeli (2004) as used in Cook and Schönbächler (2016); these slopes are shown for comparison only

## Sheet: Figure S1
	Figure S1. W isotope anomalies as function of the amount of W processed for data from Tusch et al. (2019).
	In contrast to the 'strong' dry-down procedure (green triangles), samples that have been treated with the 'weak' procedure (red squares),
	show a noticable analytical 183W effect that is broadly correlated with the amount of W (J. Tusch, personal communication, 2021) processed through the chemical separation procedure.
	* Non-reference materials are corrected for small radiogenic variations: µ182W* = µ182W (6/3)meas – µ182W (6/4)meas.
